# Supplementary material for: Show cards of the Global Physical Activity Questionnaire (GPAQ) – do they impact validity? A crossover study
Source: Springer Nature journal article supplement (doi:10.1186/s12889-020-8312-x), 2020-02-12

Picture of the Actigraph GT3X+

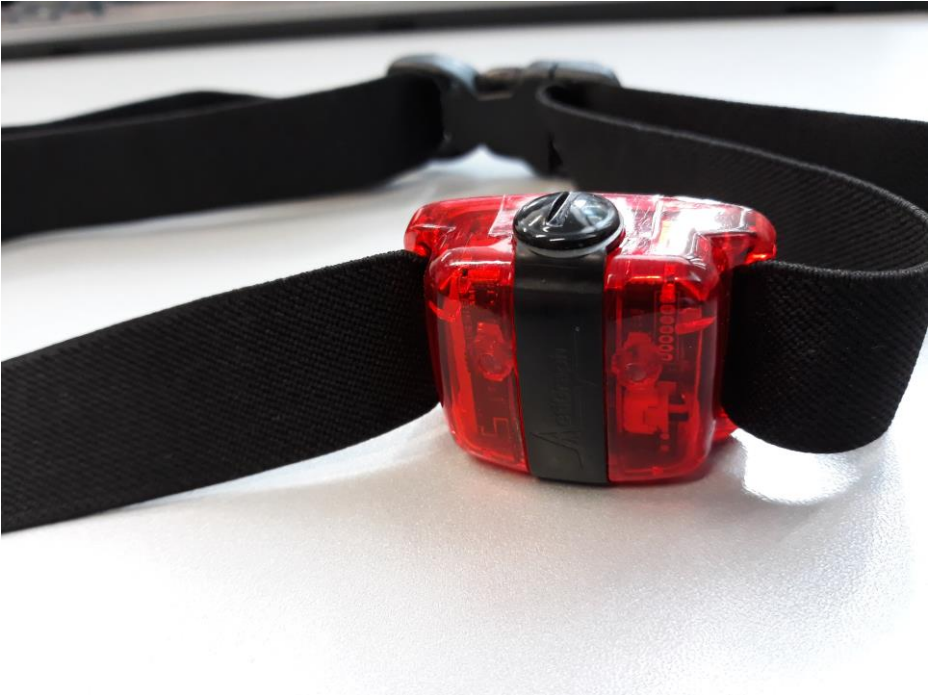

Picture of the application of the Actigraph GT3X+

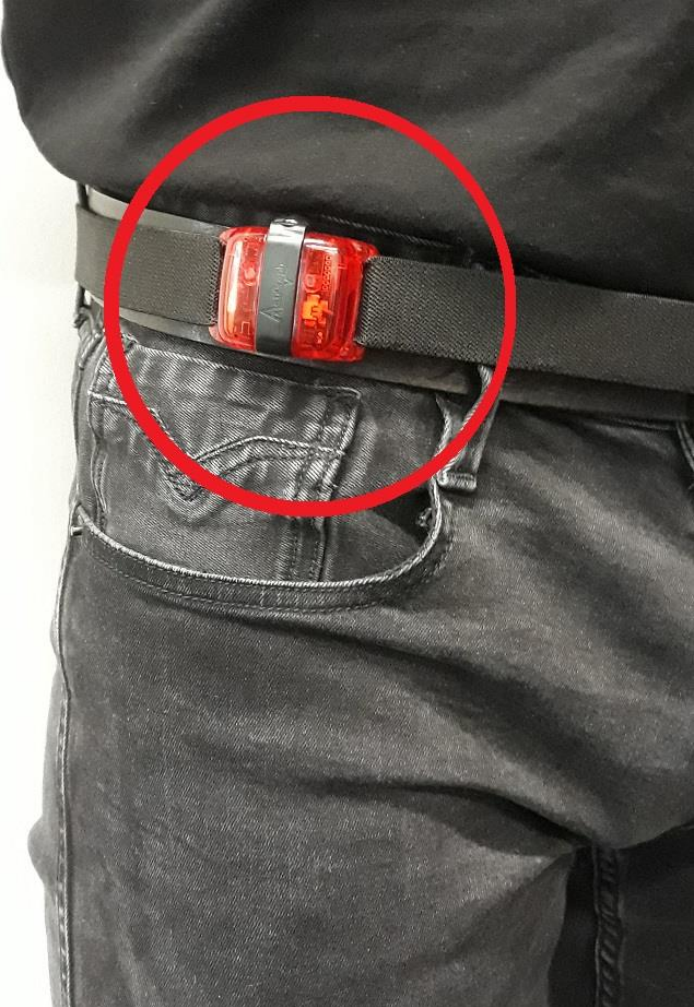

Supplement: MOESM2 [file 17691800]
